# 1                                    **Carbapenemases on the move: it's good to be on ICE**

2

3 João Botelho<sup>1\*</sup>, Adam P. Roberts<sup>2,3</sup>, Ricardo León-Sampedro<sup>4,5</sup>, Filipa Grosso<sup>1</sup>, Luísa Peixe<sup>1\*</sup>

4 Running Title: Integrative conjugative elements in *Pseudomonas* spp.

5

6 <sup>1</sup>UCIBIO/REQUIMTE, Laboratório de Microbiologia, Faculdade de Farmácia, Universidade do  
7 Porto, Porto, Portugal.

8 <sup>2</sup>Department of Parasitology, Liverpool School of Tropical Medicine, Liverpool, United  
9 Kingdom.

10 <sup>3</sup>Research Centre for Drugs and Diagnostics, Liverpool School of Tropical Medicine, Liverpool,  
11 United Kingdom.

12 <sup>4</sup>Department of Microbiology, University Hospital Ramón y Cajal, Ramón y Cajal Health  
13 Research Institute (IRYCIS), Madrid, Spain.

14 <sup>5</sup>Biomedical Research Networking Center for Epidemiology and Public Health (CIBER-ESP),  
15 Madrid, Spain.

16

17 \*Addresses for correspondence: João Botelho, Laboratório de Microbiologia. Faculdade de  
18 Farmácia da Universidade do Porto, Rua Jorge Viterbo Ferreira nº 228, 4050-313 Porto,  
19 Portugal; phone: +351 220428500; e-mail: [joaobotelho9@hotmail.com](mailto:joaobotelho9@hotmail.com); Luísa Peixe,  
20 Laboratório de Microbiologia. Faculdade de Farmácia da Universidade do Porto, Rua Jorge  
21 Viterbo Ferreira nº 228, 4050-313 Porto, Portugal; phone: +351 220428500; e-mail:  
22 [lpeixe@ff.up.pt](mailto:lpeixe@ff.up.pt).

23 **Abstract**

24 The evolution and spread of antibiotic resistance is often mediated by mobile genetic  
25 elements. Integrative and conjugative elements (ICEs) are the most abundant conjugative  
26 elements among prokaryotes. However, the contribution of ICEs to horizontal gene transfer  
27 of antibiotic resistance has been largely unexplored. Here we report that ICEs belonging to  
28 mating-pair formation (MPF) classes G and T are highly prevalent among the opportunistic  
29 pathogen *Pseudomonas aeruginosa*, contributing to the spread of carbapenemase-encoding  
30 genes (CEGs). Most CEGs of the MPF<sub>G</sub> class were encoded within class I integrons, which co-  
31 harbour genes conferring resistance to other antibiotics. The majority of the integrons were  
32 located within Tn3-like and composite transposons. A conserved attachment site could be  
33 predicted for the MPF<sub>G</sub> class ICEs. MPF<sub>T</sub> class ICEs carried the CEGs within composite  
34 transposons which were not associated with integrons. The data presented here provides a  
35 global snapshot of the different CEG-harboring ICEs and sheds light on the underappreciated  
36 contribution of these elements for the evolution and dissemination of antibiotic resistance  
37 on *P. aeruginosa*.

38

39

40

41

42

43

44

## 45 Introduction

46 Among the non-fermenting Gram-negative bacteria, the *Pseudomonas* genus is the one with  
47 the highest number of species [1, 2]. *Pseudomonas aeruginosa*, an opportunistic human  
48 pathogen associated with an ever-widening array of life-threatening acute and chronic  
49 infections, is the most clinically relevant species within this genus [3–5]. *P. aeruginosa* is one  
50 of the CDC “ESKAPE” pathogens – *Enterococcus faecium*, *Staphylococcus aureus*, *Klebsiella*  
51 *pneumoniae*, *Acinetobacter baumannii*, *P. aeruginosa* and *Enterobacter* species –,  
52 emphasizing its impact on hospital infections and the ability of this microorganism to “escape”  
53 the activity of antibacterial drugs [6]. *P. aeruginosa* can develop resistance to a wide range of  
54 antibiotics due to a combination of intrinsic, adaptive, and acquired resistance mechanisms,  
55 such as the reduction of its outer membrane permeability, over-expression of constitutive or  
56 inducible efflux pumps, overproduction of AmpC cephalosporinase, and the acquisition of  
57 antibiotic resistance genes (ARGs) through horizontal gene transfer (HGT) [4, 7, 8]. *P.*  
58 *aeruginosa* has a non-clonal population structure, punctuated by specific sequence types  
59 (STs) that are globally disseminated and frequently linked to the dissemination of ARGs [4, 9].  
60 These STs have been designated as high-risk clones, of which major examples are ST111,  
61 ST175, ST235 and ST244.

62 Due to its high importance for human medicine, carbapenems are considered by the World  
63 Health Organization (WHO) as Critically-Important Antimicrobials that should be reserved for  
64 the treatment of human infections caused by MDR Gram-negative bacteria [10], such as *P.*  
65 *aeruginosa*. Carbapenem-resistant *P. aeruginosa* is in the “critical” category of the WHO’s  
66 priority list of bacterial pathogens for which research and development into new antibiotics  
67 is urgently required [11]. Besides *P. aeruginosa*, carbapenem resistance has been reported in

68 other *Pseudomonas* spp. and is often mediated by the acquisition of carbapenemase-  
69 encoding genes (CEGs) [12–14]. Carbapenemases are able to hydrolyse carbapenems and  
70 confer resistance to virtually all  $\beta$ -lactam antibiotics [15]. When it comes to the *Pseudomonas*  
71 genus, CEGs are mostly present on class I integrons within the chromosome [4]. Class I  
72 integrons are genetic elements that carry ARGs and an integrase gene, which controls  
73 integration and excision of genes [16–18] . Mobile genetic elements (MGEs) such as  
74 transposons, plasmids and integrative and conjugative elements (ICEs), are responsible for  
75 the spread of ARGs [19–23]. The phage-inducible chromosomal islands are a recently reported  
76 family of MGEs, but unrelated to the carriage of ARGs [24].

77 Usually, the genes acquired by HGT are integrated in common hotspots in the host's  
78 chromosome, comprising a cluster of genes designated by genomic islands (GIs) [19, 25, 26].  
79 This broad definition may also encompass other MGEs, such as ICEs and prophages. Although  
80 the exact origin of these elements remains unknown, a growing body of evidence shows that  
81 phages are one of the likely major ancestors of ICEs [27] [28]. ICEs are self-transmissible  
82 mosaic and modular MGEs that combine features of transposons and phages (ICEs can  
83 integrate into and excise from the chromosome), and plasmids (ICEs can also exist as circular  
84 extrachromosomal elements, replicate autonomously and be transferred by conjugation) [21,  
85 25, 29–31]. Integrative and mobilizable elements (IMEs) encode their own integration and  
86 excision systems, but take advantage of the conjugation machinery of co-resident conjugative  
87 elements to be successfully transferred [32]. ICEs usually replicate as part of the host genome  
88 and are vertically inherited, remaining quiescent, and with most mobility genes repressed [33,  
89 34]. These elements also encode recombinases related to those in phages and other  
90 transposable elements. Conjugation involves three mandatory components: a relaxase  
91 (MOB), a T4SS and a type-IV coupling protein (T4CP) [35, 36]. Four mating-pair formation

92 (MPF) classes cover the T4SS among Proteobacteria: MPF<sub>T</sub>, MPF<sub>G</sub>, MPF<sub>F</sub> and MPF<sub>I</sub> [37]. The  
93 first is widely disseminated among conjugative plasmids and ICEs, while MPF<sub>F</sub> is more  
94 prevalent in plasmids of  $\gamma$ -Proteobacteria and MPF<sub>G</sub> is found essentially on ICEs. MPF<sub>I</sub> is rarely  
95 identified. Guglielmini *et al.* constructed a phylogenetic tree of VirB4, a highly conserved  
96 ATPase from the T4SS apparatus of different conjugative plasmids and ICEs, and formulated  
97 the hypothesis of interchangeable conjugation modules along their evolutionary history [38].  
98 A close interplay between these elements in the ancient clades of the phylogenetic tree was  
99 observed, suggesting that plasmids may behave like ICEs and vice-versa, reinforcing the  
100 common assumption that the line separating ICEs and conjugative plasmids is blurring [30,  
101 39]. These authors also searched more than 1000 genomes and found that ICEs are present  
102 in most bacterial clades and are more prevalent than conjugative plasmids [38]. It was also  
103 observed that the larger the genome, the higher the likelihood to harbour a conjugative  
104 element at a given moment, which supports the common assumption that bacteria with large  
105 genomes are more prone to acquire genes by HGT [40, 41].

106 Delimiting ICEs in genomic data remains particularly challenging [26]. Some signatures  
107 features are frequently observed, such as a sporadic distribution, sequence composition bias,  
108 insertion next to or within a tRNA gene, bordering attachment (*att*) sites and over-  
109 representation of mobility genes of the type-IV secretion system (T4SS). However, some ICEs  
110 present atypical features and may not be detected by these approaches [26, 40]. In *P.*  
111 *aeruginosa*, most ICEs fall into three large families: the ICE<sub>*clc*</sub>, pKLC102 and Tn4371. The  
112 PAGI2(C), PAGI3(SG), PAGI-13, PAGI-15 and PAGI-16 were previously described as members  
113 of the ICE<sub>*clc*</sub> family, while the PAPI-1, PAPI-2, PAGI-4 and PAGI-5 were linked to the pKLC102  
114 family [19]. The ICE<sub>Tn4371</sub> family also represents a large group of ICEs with a common backbone

115 and which are widely distributed, such as in *P. aeruginosa* UCBPP-PA14, PA7 and PACS171b  
116 strains [21]. These ICEs have been frequently implicated in virulence [42, 43].

117 Previous reports characterized the complete nucleotide sequence of extra-chromosomal  
118 genetic elements housing different CEGs in pseudomonads [20, 44–47]; however, the  
119 association of CEGs with chromosome-located MGEs has rarely been investigated [48–50].  
120 Taking into consideration that i) in pseudomonads, CEGs are frequently located within the  
121 chromosome, ii) ICEs are the most abundant conjugative elements in prokaryotes and iii) ICEs  
122 are more frequently identified in large bacterial genomes, such as in pseudomonads, we  
123 hypothesize that ICEs may play a key role in the horizontal spread of CEGs. To investigate this  
124 hypothesis, we developed an *in silico* approach to explore the association between ICEs and  
125 CEGs in pseudomonads.

126

## 127 **Methods**

### 128 **Carbapenemases database**

129 Antimicrobial resistance translated sequences were retrieved from the Bacterial  
130 Antimicrobial Resistance Reference Gene Database available on NCBI  
131 ([ftp://ftp.ncbi.nlm.nih.gov/pathogen/Antimicrobial\\_resistance/AMRFinder/data/2018-04-  
132 16.1/](ftp://ftp.ncbi.nlm.nih.gov/pathogen/Antimicrobial_resistance/AMRFinder/data/2018-04-16.1/)). The resulting 4250 proteins were narrowed down to 695 different carbapenemases to  
133 create a binary DIAMOND (v. 0.9.21, <https://github.com/bbuchfink/diamond>) database [51].  
134 Only the sequences presenting ‘carbapenem-hydrolyzing’ or ‘metallo-beta-lactamase’ on  
135 fasta-headers were used to build this local database.

136

## 137 **Genome collection and blast search**

138 A total of 4565 *Pseudomonas* genomes was downloaded from NCBI (accessed on the 24<sup>th</sup> of  
139 April, 2018). These genomes were blasted against the local carbapenemase database using  
140 the following command: 'diamond blastx -d DB.dmnd -o hits.txt --id 100 --subject-cover 100  
141 -f 6 --sensitive'.

142

## 143 **Bioinformatic prediction of ICEs and genetic environment analyses**

144 The CEG-harboring *Pseudomonas* genomes were annotated through Prokka v. 1.12  
145 (<https://github.com/tseemann/prokka>) [52]. The translated coding sequences were analysed  
146 in TXSScan/CONJscan platform to inspect the presence of ICEs  
147 ([https://galaxy.pasteur.fr/root?tool\\_id=toolshed.pasteur.fr%2Frepos%2Fodoppelt%2Fconjscan%2FConjScan%2F1.0.2](https://galaxy.pasteur.fr/root?tool_id=toolshed.pasteur.fr%2Frepos%2Fodoppelt%2Fconjscan%2FConjScan%2F1.0.2)) [37]. All ICEs harbouring CEGs predicted by TXSScan/CONJscan  
148 were inspected for direct repeats that define the boundaries of the element. The complete  
149 nucleotide sequence in Genbank format of corresponding records was imported into  
150 Geneious v. 9.1.8 to help delimiting genomic regions flanking the ICEs [53]. Complete ICE  
151 sequences were aligned with EasyFig v. 2.2.2 (<http://mjsull.github.io/Easyfig/files.html>) [54].  
152 Screening of complete ICEs for ARGs was achieved by ABRicate v. 0.8  
153 (<https://github.com/tseemann/abricate>). Phage and insertion sequences were inspected  
154 through PHASTER (<http://phaster.ca/>) and ISfinder (<https://www-is.biotoul.fr/>), respectively  
155 [55, 56]. Multiple Antibiotic Resistance Annotator (MARA, <http://mara.spokade.com>) was  
156 used to explore the genetic background of the CEGs [57]. Orthologous assignment and  
157 functional annotation of integrase sequences was achieved through EggNOG v. 4.5.1  
158

159 (<http://eggnogdb.embl.de/#/app/home>) and InterProScan 5

160 (<https://www.ebi.ac.uk/interpro/search/sequence-search>) [58, 59].

161

## 162 **Phylogenomics**

163 All CEG-harboured *P. aeruginosa* genomes were mapped against the *P. aeruginosa* PAO1  
164 reference strain (accession number NC\_002516.2), to infer a phylogeny based on the  
165 concatenated alignment of high quality single nucleotide polymorphisms (SNP) using CSI  
166 Phylogeny and standard settings [60]. The phylogenetic tree was plotted using the iTOL  
167 platform (<https://itol.embl.de/>).

168

## 169 **MLST and taxonomic assignment of unidentified species**

170 To predict the sequence type (ST) of the strains harbouring ICEs, the *P. aeruginosa* MLST  
171 website (<https://pubmlst.org/paeruginosa/>) developed by Keith Jolley and hosted at the  
172 University of Oxford was used [61]. Taxonomic assignment of unidentified species carrying  
173 ICEs was achieved by JSpeciesWS v. 3.0.17 (<http://jspecies.ribohost.com/jspeciesws/#home>)  
174 [62].

175

176

177

178

179



180 **Results**

181 **A plethora of carbapenemase-encoding genes was identified in a subset of *Pseudomonas***  
182 **species**

183 From the total *Pseudomonas* genomes analysed (n=4565), 313 CEGs were identified in 297  
184 genomes (**Figure 1** and **Table S1**). As expected, *bla*<sub>VIM-2</sub> represents the majority of the CEGs  
185 found among *Pseudomonas* spp., being detected mainly in *P. aeruginosa*, followed by *P.*  
186 *plecoglocissida*, *P. guariconensis*, *P. putida*, *P. stutzeri* and 16 genomes corresponding to  
187 unidentified species (**Table S1**). Curiously, some strains presented two CEGs, either presenting  
188 a duplication of the same gene, such as *bla*<sub>IMP-34</sub> from NCGM 1900 and NCGM 1984 Japanese  
189 isolates, or harbouring different CEGs, such as *bla*<sub>IMP-1</sub> and *bla*<sub>DIM-1</sub> in isolates 97, 130 and 142  
190 recovered in Ghana (**Table S1**, highlighted in red). A wide variety of STs was also observed,  
191 including the high-risk clones ST111, ST175 and ST244.

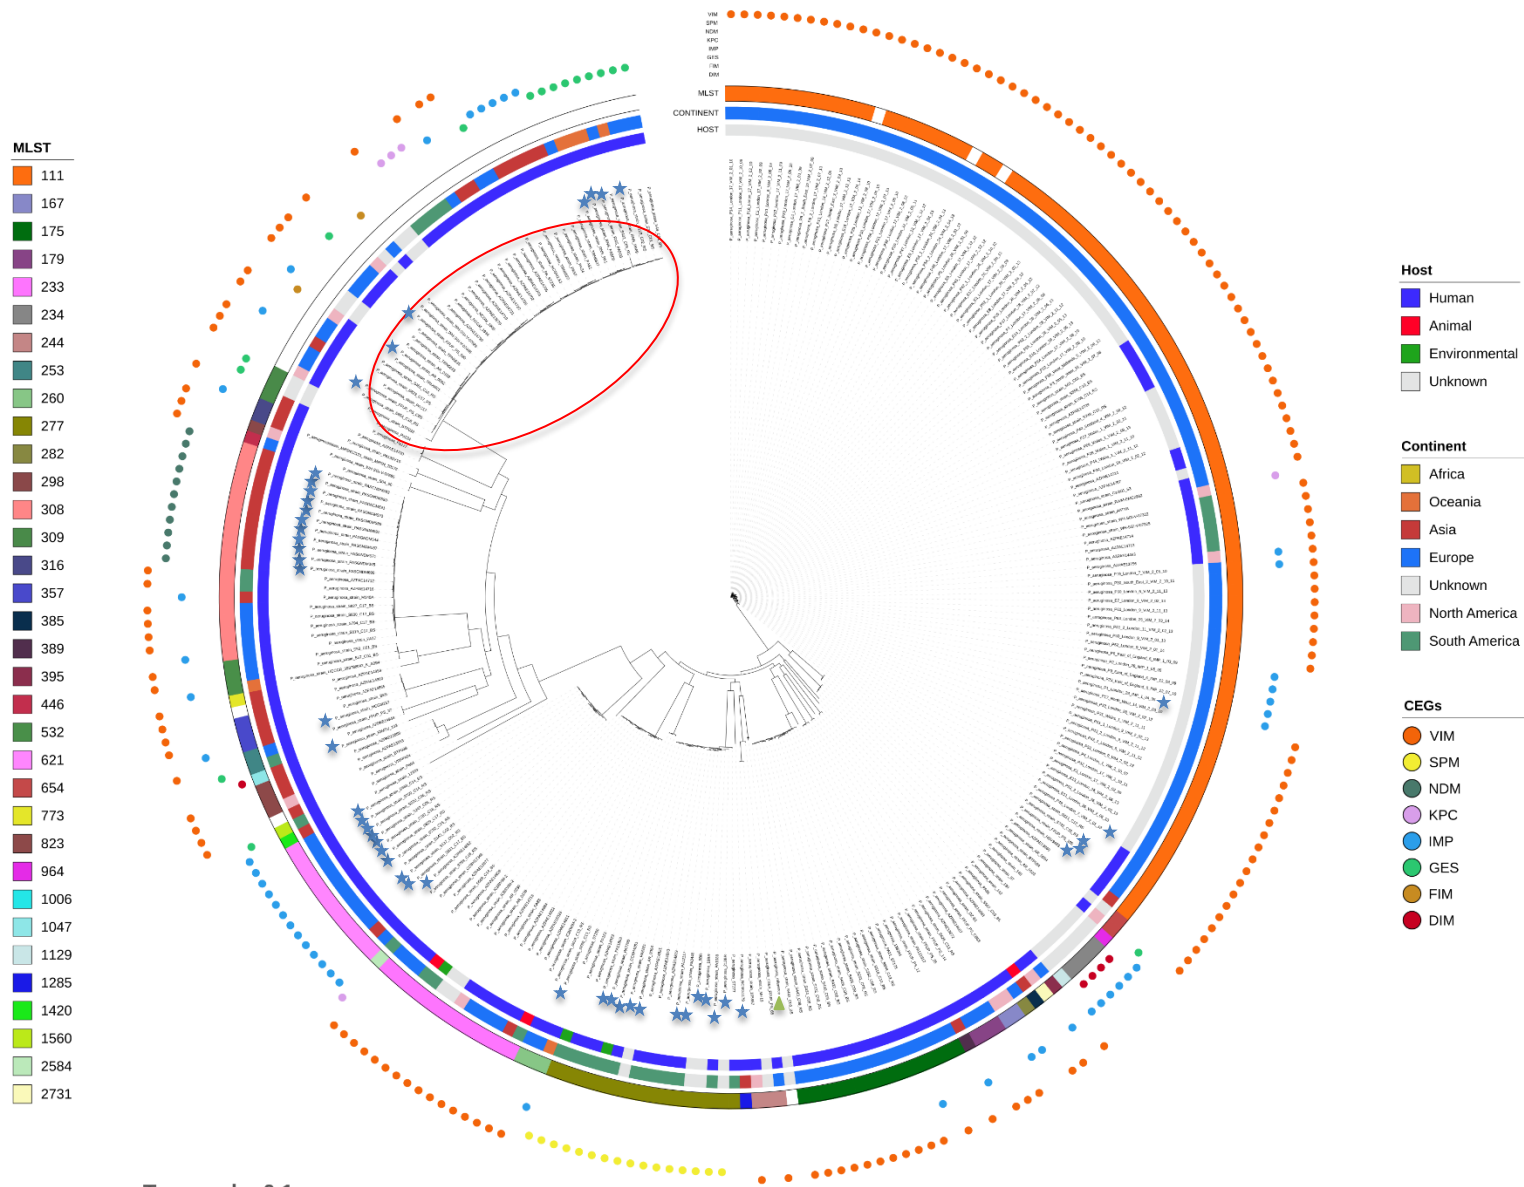

193 **Figure 1** – Whole-genome phylogeny of the CEG-carrying *P. aeruginosa* isolates. The  
194 maximum-likelihood phylogenetic tree was constructed using 146,106 SNPs spanning the  
195 whole genome and using the *P. aeruginosa* PAO1 genome (highlighted by a green triangle) as  
196 a reference. Multilocus sequence typing (MLST), continent and host data are reported on the  
197 outer-most, middle and inner-most circles, respectively. The strains belonging to a double ST  
198 profile (ST235/ST2613) are included within the red ellipse. Blue stars point out *P. aeruginosa*  
199 strains for which a CEG-harboring ICE was predicted. The *P. aeruginosa* AR\_0356 genome  
200 (accession number CP027169.1) was removed from the tree since it corresponds to a strain  
201 of which host and origin are unknown. The phylogenetic distance from the tree root to this  
202 genome is 1 (calculated with the tree scale). The Newick format file for the original tree is  
203 included in the Supplementary information.

204

#### 205 **Detection of ICEs encoding carbapenemases in *Pseudomonas* spp.**

206 65.5% (205/313, **Table S1**) of the CEG hits are located within small contigs, with a sequence  
207 smaller than 20kb in length. The presence of repeated regions, such as those encoding for  
208 transposases, tend to split the genome when second-generation sequencing approaches are  
209 used. Based on information retrieved from NCBI (accessed on the 24<sup>th</sup> of May, 2018), the total  
210 number of bacterial genomes sequenced at the chromosome/complete genome level is  
211 12,077, while the number of genomes sequenced at the scaffold/contig is much larger  
212 (127,231). With this sequencing limitation, we were still able to identify 49 ICEs associated  
213 with CEGs (n=20 with complete sequence) among all pseudomonads genomes (**Table 1, Table**  
214 **S1 and Figure 1**). When an ICE location was attributed to a CEG located on a small contig, the  
215 assumption was based on previously published data, as pointed out on **Table 1**. Besides the

216    aforementioned ICEs, we also identified a putative MGE within *Pseudomonas* sp. NBRC  
217    111143 strain (**Table S1**). The T4CP-encoding gene was absent from this *bla*<sub>IMP-10</sub>-carrying  
218    element, which could be due to contig fragmentation or gene absence. In case the gene is  
219    actually missing, this element could still be mobilized by the conjugation machinery of an ICE  
220    or conjugative plasmid(s) present in the host, and should be classified as an IME.

221    The ICEs identified here were all integrated within *P. aeruginosa* genomes (with the exception  
222    of the one element identified in *Pseudomonas* sp. PONI3 genome) and AT-rich when  
223    compared to their host's chromosome; the mean GC value for this species is 66.2% according  
224    to EZBioCloud (<https://www.ezbiocloud.net/taxon?tn=Pseudomonas%20aeruginosa>) (**Table**  
225    **1**).

226 **Table 1.** Main characteristics of CEG-carrying ICEs described in this study.

| ICE family | Type of integrase <sup>1</sup>                                   | CEG                                                       | N <sup>o</sup> strains | ST <sup>2</sup> | Country   | Isolation source <sup>3</sup>                           | CONJscan T4SS type <sup>4</sup> | Size range (if complete, kb) <sup>5</sup> | GC range (if complete, %) <sup>6</sup> | CEG within a class I integron | CEG within a transposon  | Other ARGs <sup>7</sup>                      | References           |
|------------|------------------------------------------------------------------|-----------------------------------------------------------|------------------------|-----------------|-----------|---------------------------------------------------------|---------------------------------|-------------------------------------------|----------------------------------------|-------------------------------|--------------------------|----------------------------------------------|----------------------|
| Tn4371     | Shufflon-specific DNA recombinase Rci and Bacteriophage Hp1-like | <i>bla</i> <sub>NDM-1</sub>                               | 11                     | 308             | Singapore | Urine, foot wound swab, endotracheal tube aspirate      | T                               | 73.7                                      | 64.7                                   | No                            | Yes (ISCR24-composite)   | <i>Δble</i> , <i>Δbla</i> <sub>PME-1</sub>   | [63], this study     |
|            |                                                                  | <i>bla</i> <sub>SPM-1</sub><br>(as single or double copy) | 11                     | 277             | Brazil    | Urine, bloodstream, tracheal aspirate, catheter tip, NA | T                               | 43.8 – 57.7                               | 64.9 – 65.6                            | No                            | Yes (ISCR4 composite)    | None                                         | [64, 65], this study |
|            |                                                                  | <i>bla</i> <sub>KPC-2</sub><br>(double copy)              | 1                      | NA              | USA       | Wastewater                                              | T                               | 61.2                                      | 59.2                                   | No                            | Yes (complex transposon) | <i>bla</i> <sub>SHV-12</sub> , <i>qnrB19</i> | [66], this study     |

|        |                  |                              |    |                |              |                                                                   |   |             |             |     |                |                                                                                                                       |                      |
|--------|------------------|------------------------------|----|----------------|--------------|-------------------------------------------------------------------|---|-------------|-------------|-----|----------------|-----------------------------------------------------------------------------------------------------------------------|----------------------|
| ICEcIc | Bacteriophage P4 | <i>bla</i> <sub>IMP-13</sub> | 10 | 621            | Italy, India | Urinary tract infection, respiratory sample, blood                | G | NA          | NA          | Yes | Yes (Tn3-like) | <i>aacA4-C329</i> , <i>sul1</i>                                                                                       | [67], this study     |
|        |                  | <i>bla</i> <sub>GES-5</sub>  | 4  | 235            | Australia    | Rectal swab, blood culture, hospital ward, hospital gel hand wash | G | 92.8        | 61.9        | Yes | Yes (Tn3-like) | <i>aacA4r15</i> , <i>gcuE15</i> , <i>aphA15</i> , <i>sul1</i>                                                         | [48], this study     |
|        |                  | <i>bla</i> <sub>VIM-2</sub>  | 4  | 111, 235       | Portugal, UK | Urine, bronchial aspirate, NA                                     | G | 83.4 – 88.9 | 62.0        | Yes | Yes (Tn3-like) | <i>aacC2b</i> , <i>aacA7</i> , <i>aacC1</i> , <i>aacA4-C329</i> , <i>sul1</i>                                         | [50, 68], this study |
|        |                  | <i>bla</i> <sub>IMP-1</sub>  | 3  | 111, 357, 1285 | Japan, UK    | Midstream urine, NA                                               | G | 76.2 – 96.4 | 61.9 – 62.3 | Yes | Yes (Tn3-like) | $\Delta$ <i>aacA4-C329</i> , <i>aadB</i> , <i>aacA28</i> , <i>aadA1a</i> , <i>cmlA9</i> , <i>tet(G)</i> , <i>sul1</i> | [68, 69], This study |

|  |  |                              |   |      |          |                  |    |      |      |     |                                          |                                                                                                       |                  |
|--|--|------------------------------|---|------|----------|------------------|----|------|------|-----|------------------------------------------|-------------------------------------------------------------------------------------------------------|------------------|
|  |  | <i>bla</i> <sub>DIM-1</sub>  | 1 | 1047 | Nepal    | Urinary catheter | G  | 88.7 | 62.8 | Yes | Yes (IS6100 composite)                   | <i>dfrB5</i> ,<br><i>ΔaacA4-C329</i> ,<br><i>rmtF</i> ,<br><i>catB12</i>                              | This study       |
|  |  | <i>bla</i> <sub>GES-6</sub>  | 1 | 235  | Portugal | Urine            | G  | 86.6 | 63.0 | Yes | Yes (defective Tn402-like)               | <i>aacA7</i> , <i>sul1</i>                                                                            | [49]             |
|  |  | <i>bla</i> <sub>IMP-14</sub> | 1 | 2613 | NA       | NA               | NA | NA   | NA   | Yes | Yes (IS6100 composite within a Tn3-like) | <i>aadB</i> , <i>bla</i> <sub>OXA-10-A</sub> ,<br><i>aacA4-T329</i> , <i>sul1</i>                     | This study       |
|  |  | <i>bla</i> <sub>VIM-1</sub>  | 1 | 111  | Italy    | Blood            | G  | NA   | NA   | Yes | Yes (Tn3-like)                           | <i>aacA4-C329</i> ,<br><i>bla</i> <sub>OXA-2</sub> ,<br><i>gcu10</i> ,<br><i>aadA13</i> , <i>sul1</i> | [67], this study |

227 ARGs, antibiotic resistance genes; ICE, integrative and conjugative element; NA, Not available; ST, sequence type;

228 <sup>1</sup>NA is shown when no integrase was identified;

229 <sup>2</sup>NA is shown when the ICE was identified on a species for which no MLST scheme has been developed;

230 <sup>3</sup>NA is shown when the isolation source was not provided by sequence authors;

231 <sup>4</sup>NA is shown when no output was obtained by the platform or the conjugative module system was incomplete due to contig fragmentation;

232 <sup>5,6</sup>NA is shown when the ICE sequence was incomplete due to contig fragmentation or delimitation of the entire element was not successful;

233 <sup>7</sup>Representation of total ARGs associated with the same CEG; a given strain harbouring the referred CEG may not present all ARGs here reported; Δ represents incomplete genes.

234

235 All ICEs identified here possessed only one tyrosine integrase (**Figure 2**). ICEs belonging to the  
236 *ICE<sub>clc</sub>* family (MPF<sub>G</sub> class) carried an integrase belonging to the bacteriophage P4-like family,  
237 while ICEs belonging to the *ICE<sub>Tn4371</sub>* family (MPF<sub>T</sub> class) carried an integrase belonging to  
238 shufflon-specific DNA recombinase Rci and Bacteriophage Hp1-like family (**Table 1**).<sup>31</sup> Rci and  
239 Hp1-like were only distantly related (13% amino acid identity) to P4-like integrases.  
240 Orthologous assignment of these integrases revealed that the former and the later integrases  
241 identified were present in more than 100 and 400 proteobacteria species, respectively. While  
242 P4-like integrases were more prevalent on  $\gamma$ -proteobacteria, half of the strains carrying Rci  
243 and Hp1-like integrases belong to the  $\alpha$ -proteobacteria.

244



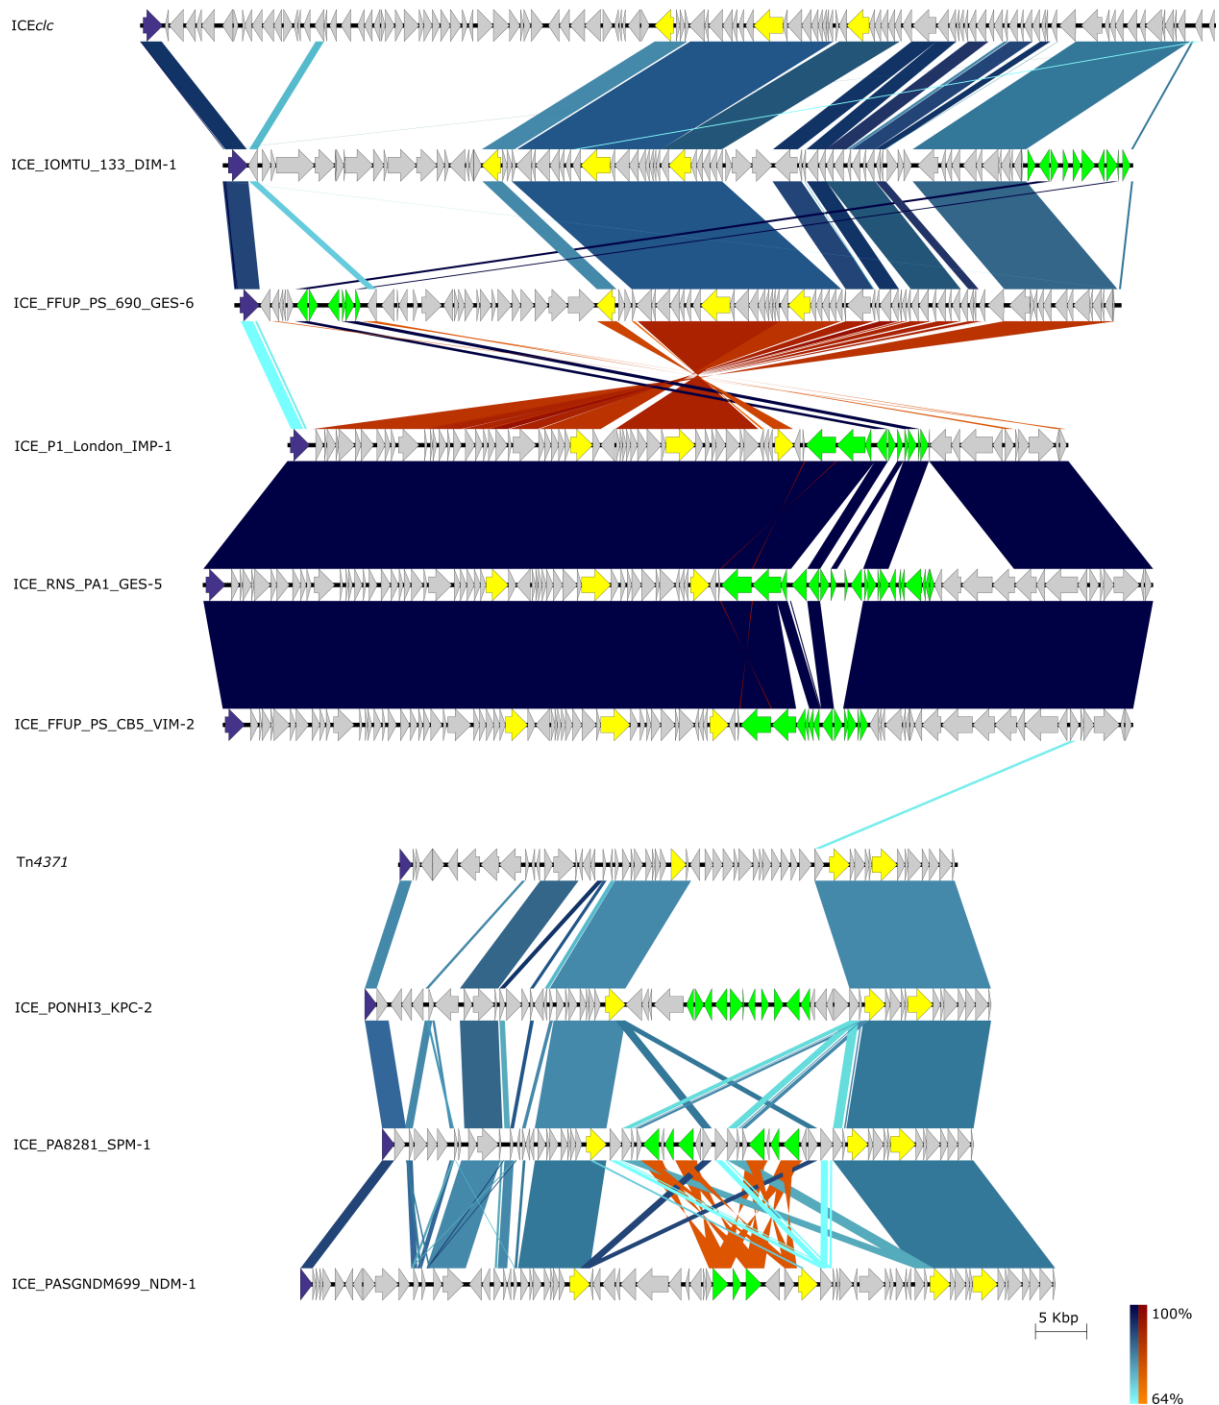

251 of a conjugative system according to Cury *et al.* [40] and in green the transposons harbouring  
252 the CEGs. A more detailed view of some of these transposons is displayed in **Figure 3**.

253

254 We observed that MPF<sub>G</sub> class ICEs tend to integrate next to a single copy of tRNA<sup>Gly</sup> or a cluster  
255 of two tRNA<sup>Glu</sup> and one tRNA<sup>Gly</sup> genes, which is in agreement with previous findings [26, 40].

256 A conserved 8-bp *att* site (5'-CCGCTCCA) flanked all complete ICEs of the MPF<sub>G</sub> class identified  
257 here (**Table 1**). Notably, most ICEs of this class were adjacent to phages (either at the 5'- or  
258 the 3'-end) targeting the same *att* site as the neighbour ICE. No *att* site could be identified for  
259 the integration of MPF<sub>T</sub> class ICEs. A gene encoding for a catechol 1,2-dioxygenase and a gene  
260 encoding for a protein with no described conserved domain were found flanking the *bla*<sub>SPM-1</sub>-  
261 harbouring ICEs. Regarding the elements carrying *bla*<sub>NDM-1</sub>, a gene encoding for a different  
262 protein also with no conserved domain identified and a gene encoding for the type III  
263 secretion system adenylate cyclase effector ExoY were separated upon insertion of these  
264 ICEs. Integration next to hypothetical proteins or tRNA genes was commonly observed.

265

### 266 **Carbapenemases are frequently encoded within transposons**

267 CEGs were associated with class I integrons frequently co-harbouring aminoglycoside  
268 resistance genes when associated with MPF class G ICEs (**Table 1**). Class I integrons were often  
269 associated with a wide array of transposons, such as the Tn3 superfamily transposons and the  
270 *IS6100* composite elements (**Table 1**). MPF<sub>T</sub> class ICEs were targeted by more complex  
271 elements, such as the composite transposons carrying *bla*<sub>SPM-1</sub> and *bla*<sub>NDM-1</sub> (**Table 1**). The  
272 *bla*<sub>NDM-1</sub> gene was identified in Singapore in ICE<sub>Tn4371</sub>6385 and associated with ST308, as  
273 recently reported [63]. The *bla*<sub>NDM-1</sub> was flanked by two *ISCR24*-like transposases. *bla*<sub>SPM-1</sub> was

274 linked to ICE<sub>Tn4371</sub>6061, a recently described ICE [64]. Again, the CEG was located within an  
275 ISCR4-like composite transposon. ISCR elements are atypical elements of the IS91 family  
276 which represent a well-recognized system of gene capture and mobilization by a rolling-circle  
277 transposition process [21, 70].

278 Besides previously described *bla*<sub>NDM-1</sub> and *bla*<sub>SPM-1</sub> harbouring ICEs, we characterize here new  
279 ICE elements of MPF<sub>G</sub> and MPF<sub>T</sub> classes (**Table 1** and **Figure 3**). The *bla*<sub>DIM-1</sub>-harbouring ICE  
280 from IOMTU 133 strain was integrated between the 3'-end of a tRNA<sup>Gly</sup> gene  
281 (IOMTU133\_RS11660) and a gene encoding for the R body protein RebB  
282 (IOMTU133\_RS12085). *bla*<sub>DIM-1</sub> was first described as a single gene cassette located within a  
283 class I integron associated with a 70-kb *Pseudomonas stutzeri* plasmid recovered in the  
284 Netherlands [13]. However, the integron carrying *bla*<sub>DIM-1</sub> in strain IOMTU 133 was unrelated  
285 to the one from the *P. stutzeri* plasmid, harbouring genes encoding for aminoglycoside  
286 (*aacA4-C329* and *rmtf*), trimethoprim (*dfrB5*) and chloramphenicol (*catB12*) resistance  
287 (**Figure 3A**). Direct repeats (DRs) were found flanking the entire IS6100 composite transposon  
288 (5'-TTCGAGTC), indicating the transposition of this element into the ICE element. Besides  
289 being identified as a composite transposon, IS6100 was frequently observed as a single copy  
290 at the 3'end of the class I integron (**Figures 3B and 3C**), suggesting that these elements were  
291 derived from the In4 lineage [71]. The *bla*<sub>IMP-1</sub> from the NCGM257 strain identified in Japan  
292 belonged to a different ST (ST357) than the frequently identified ST235 associated with the  
293 spread of this CEG in this country [72]. The CEG was also shown to be associated with a novel  
294 complex class I integron, co-harbouring *aadB*, *cmlA9* and *tet(G)* genes encoding resistance to  
295 aminoglycosides, chloramphenicol and tetracyclines, respectively (**Figure 3B**). This integron  
296 was inserted (DRs 5'- GAGTC) within a mercury resistance transposon. This genetic  
297 organization was frequently recovered among other ICE-harbouring strains, such as the ones

298 associated with *bla*<sub>GES-5</sub>, *bla*<sub>IMP-13</sub> and *bla*<sub>IMP-14</sub> (**Table 1**). The entire ICE was integrated into the  
299 chromosome of NCGM257 strain between the 3'-end of a tRNA<sup>Gly</sup> gene (PA257\_RS24790) and  
300 the aforementioned *Pseudomonas* phage Pf1-like element. The new ICE identified on the  
301 P1\_London\_28\_IMP\_1\_04\_05 strain presented *bla*<sub>IMP-1</sub> in a different In4-like integron than  
302 that observed for the NCGM257 strain, even though both elements were associated with a  
303 Tn3-like transposon (**Figure 3C**). Unlike most ICEs of the MPF<sub>G</sub> class, its integration occurred  
304 between a gene encoding for a LysR family transcriptional regulator (AFJ02\_RS19410) and a  
305 gene encoding for a hypothetical protein (AFJ02\_RS19770). Regarding the *bla*<sub>KPC-2</sub>-harbouring  
306 *Pseudomonas* sp. PONHI3 strain, a tetra correlation search revealed that this strain was highly  
307 similar (Z-score above the 0.999 cut-off) to *Pseudomonas mosselii* SJ10 (accession number  
308 NZ\_CP009365.1). Average nucleotide identity based on BLAST (ANI<sub>b</sub>) analysis of these  
309 genomes revealed that both strains belong to the same species, since the ANI<sub>b</sub> value was  
310 above the 95% cut-off for species delineation [73]. However, the ANI<sub>b</sub> value for both strains  
311 was below the cut-off when compared with the *P. mosselii* DSM 17497 type strain (accession  
312 number NZ\_JHYW00000000.1), suggesting that both strains may comprise novel species  
313 within the *Pseudomonas putida* phylogenetic group [2]. The PONHI3 strain carried a double  
314 copy of *bla*<sub>KPC-2</sub> within an ICE from MPF<sub>T</sub> class. A complex genetic environment was found  
315 surrounding these genes (**Figure 3D**). This ICE was integrated between a gene encoding for a  
316 biopolymer transport protein ExbD/ToIR (C3F42\_RS18665) and a gene encoding for an  
317 alpha/beta hydrolase (C3F42\_RS18995).

318

319

320

321 **A**

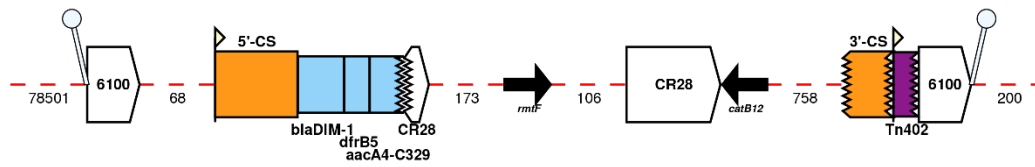

322

323 **B**

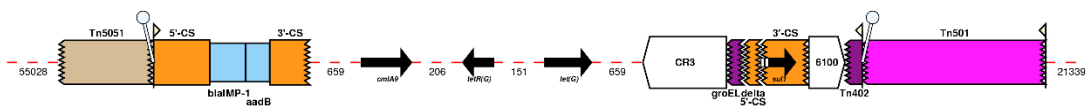

324

325 **C**

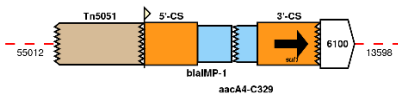

326

327 **D**

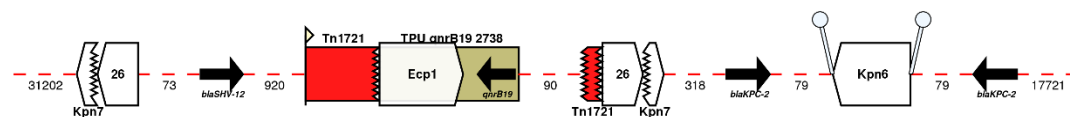

328

329 **Figure 3.** Genetic environment of novel ICEs harbouring *bla*<sub>DIM-1</sub> (A), *bla*<sub>IMP-1</sub> (B and C) and a  
 330 double copy of *bla*<sub>KPC-2</sub> (D). Arrows indicate the direction of transcription for genes. The  
 331 dashed part of the arrow indicates which end is missing, for other features the missing end is  
 332 shown by a zig-zag line. Gene cassettes are shown by pale blue boxes, the conserved  
 333 sequences (5' and 3'-CS) of integrons as orange boxes and insertion sequences as white block  
 334 arrows labelled with the IS number/name, with the pointed end indicating the inverted right

335 repeat (IRR). Gaps >50 bp are indicated by dashed red lines and the length in bp given. Unit  
336 transposons are shown as boxes of different colors and their IRs are shown as flags, with the  
337 flat side at the outer boundary of the transposon. Direct repeats are shown as 'lollipops' of  
338 the same color.

339

#### 340 **An atypical GI encoding carbapenemases**

341 Besides ICEs, we also identified an atypical 19.8-kb long GI harbouring *bla*<sub>VIM-2</sub> in *P. aeruginosa*  
342 AZPAE13853 and AZPAE13858 strains from India (**Figure S1**). A similar element was also  
343 observed in *P. aeruginosa* BTP038 strain from the USA, with the exception that the Tn402-like  
344 transposon harbouring *bla*<sub>VIM-2</sub> was orientated in an inverted position. Five base-pair DRs (5'-  
345 CTCTG in AZPAE13853 and AZPAE13858 and 5'-CTGAG in BTP038 strains) were found flanking  
346 this transposon structure. Importantly, in these strains the GIs were flanked by identical signal  
347 recognition particle RNAs (srpRNAs), indicating a strong site preference for these elements.

348

#### 349 **Discussion**

350 Our results show that *bla*<sub>VIM</sub> and *bla*<sub>IMP</sub> are widely disseminated, both geographically and  
351 phylogenetically (across *Pseudomonas* spp.). Moreover, and as previously described, *bla*<sub>VIM-2</sub>  
352 was the most frequently reported CEG (**Figure 1** and **Table S1**) [4]. On the other hand, *bla*<sub>SPM-</sub>  
353 <sub>1</sub> is still restricted to *P. aeruginosa* and Brazil (or patients who had been previously  
354 hospitalized in Brazil) [65]. Even though ST235 has been frequently linked to the  
355 dissemination of ARGs, no CEG-harboring strains belonging to this ST were identified.  
356 Curiously, some strains (highlighted on **Figure 1**) belong to a double ST profile

357 (ST235/ST2613), since the strains carry a double copy with different allele sequences of the  
358 house-keeping gene *acsA*, encoding for an acetyl-coenzyme A synthetase. These genes only  
359 display 80,3% nucleotide identity. We plan to conduct comparative genomic studies to  
360 explore the idiosyncrasies of these double ST profile strains.

361 Not all CEGs are likely to be geographically and phylogenetically disseminated, but those that  
362 are more promiscuous present a serious threat. The geographical distribution of the high-risk  
363 clones and the diversity of CEGs propose that the spread of these STs is global and the  
364 acquisition of the resistance genes is mainly local [4, 68]. Previous studies suggest that  
365 environmental species may pose an important reservoir for the dissemination of clinically  
366 relevant carbapenemases, which are vertically amplified upon transfer to *P. aeruginosa* high-  
367 risk clones [12, 14]. The high prevalence of these elements among high-risk clones may be  
368 partially explained by the genetic capitalism theory, given that a widely disseminated ST  
369 should have a greater probability of acquiring new CEGs and to be further selected and  
370 amplified due to the high antibiotic pressure in the hospital environment [74]. Other theories  
371 support that the high-risk clones have a naturally increased ability to acquire foreign DNA,  
372 since these STs appear to have lost the CRISPR (clustered regularly interspaced short  
373 palindromic repeats)-Cas (CRISPR associated proteins) system, which act as an adaptive  
374 immune system in prokaryotic cells and protects them from invasion by bacteriophages and  
375 plasmids [75–77].

376 This study underestimates the extent of host range because only ICEs in sequenced genomes  
377 were detected. Also, identification of new ICEs could only be achieved in complete genomes  
378 or contigs with a sequence length large enough to include the full (nor near complete)  
379 sequence of the ICE. As so, it is important to highlight the need to perform third generation

380 sequencing on CEG-harboring genomes to avoid fragmentation of the genetic environment  
381 surrounding the gene and to provide a wider view of complete supporting ICEs and other  
382 MGEs. All ICE elements here identified fulfilled the criteria to be considered conjugative as  
383 proposed by Cury *et al.*: a relaxase, a VirB4/TraU, a T4CP and minimum set of MPF type-  
384 specific genes [40]. ICEs tend to integrate within the host's chromosome by the action of a  
385 tyrosine recombinase, even though some elements may use serine or DDE recombinases  
386 instead [30]. Though rare, some elements encode for more than one integrase, most likely  
387 resulting from independent integration of different MGEs [40]. Conserved sites are hotspots  
388 for ICE integration due to their high conservation among closely related bacteria, and so  
389 expanding the host range and be stably maintained after conjugative transfer [78, 79]. ICEs  
390 were often integrated next to phages highly similar to the *Pseudomonas* phage Pf1  
391 (NC\_001331.1), a class II filamentous bacteriophage belonging to the *Inoviridae* family [77].  
392 Pf1-like phages are widely disseminated among *P. aeruginosa* strains and may have a role in  
393 bacterial evolution and virulence [80–82]. Interestingly, no representative of the pKLC102  
394 family was linked to the dissemination of CEGs. This may be explained due to a higher affinity  
395 of the transposons carrying the CEGs for hotspots located within representatives of the other  
396 two families.

397 MGEs specifically targeting conserved regions of the genome such as tRNAs are common and  
398 this specificity represents an evolutionary strategy whereby the target site of an element is  
399 almost guaranteed to be present, due to its essentiality, and very unlikely to change due to  
400 biochemical constraints of the gene product. We think a similar situation exists for the  
401 elements found between the small srpRNAs described on the atypical GI element here  
402 identified and is in contrast to the more permissive nature of target site selection shown for  
403 example, by elements of the Tn916/Tn1545 family [83].



404 Here, we revealed that different Tn3-like and composite transposons harbouring a wide array  
405 of CEGs were transposed into MPF G and T ICE classes, which were most likely responsible for  
406 the dissemination of these genes through HGT and/or clonal expansion of successful  
407 *Pseudomonas* clones. This study sheds light on the underappreciated contribution of ICEs for  
408 the spread of CEGs among pseudomonads (and potentially further afield). With the ever-  
409 growing number of third-generation sequenced genomes and the development of more  
410 sophisticated bioinformatics, the real contribution of these ICEs will likely rapidly emerge.

411 Recently, it was shown that interfering with the transposase-DNA complex architecture of a  
412 Tn916-like conjugative transposon (also known as ICE) lead to transposition inhibition to a  
413 new host [84]. In the future, it would be interesting to determine if the same mechanism is  
414 observed for tyrosine recombinases present in ICE*clc* and Tn4371 derivatives, as well as in  
415 other MPF ICE classes, as a potential approach to interfere with the spread of antimicrobial  
416 resistance.

417

## 418 **Acknowledgments**

419 This study received financial support from the European Union (FEDER funds  
420 POCI/01/0145/FEDER/007728) and National Funds (FCT/MEC, Fundação para a Ciência e  
421 Tecnologia and Ministério da Educação e Ciência) under the Partnership Agreement PT2020  
422 UID/MULTI/04378/2013. J. B. and F. G. were supported by grants from Fundação para a  
423 Ciência e a Tecnologia (SFRH/BD/104095/2014 and SFRH/BPD/95556/2013, respectively). We  
424 thank Álvaro San Millan for helpful discussions. We also thank Benjamin Buchfink (DIAMOND),  
425 Jean Cury (TXSScan/CONJscan) and Sally Partridge (MARA) for their valuable assistance.

426

427 **Author contributions**

428 JB, APR, FG and LP designed the study; JB and RLS performed the *in silico* analysis; JB wrote  
429 the manuscript. All the authors approved the final manuscript.

430

431 **Competing interests**

432 None to declare.

433

434 **References**

- 435 1. Parte AC. LPSN—list of prokaryotic names with standing in nomenclature. *Nucleic Acids Res* 2014; **42**:  
436 D613–D616.
- 437 2. Gomila M, Peña A, Mulet M, Lalucat J, García-Valdés E. Phylogenomics and systematics in  
438 *Pseudomonas*. *Front Microbiol* 2015; **6**: 214.
- 439 3. Moradali MF, Ghods S, Rehm BHA. *Pseudomonas aeruginosa* Lifestyle: A Paradigm for Adaptation,  
440 Survival, and Persistence. *Front Cell Infect Microbiol* 2017; **7**: 39.
- 441 4. Oliver A, Mulet X, López-Causapé C, Juan C. The increasing threat of *Pseudomonas aeruginosa* high-risk  
442 clones. *Drug Resist Updat* 2015; **21–22**: 41–59.
- 443 5. Juan C, Peña C, Oliver A. Host and Pathogen Biomarkers for Severe *Pseudomonas aeruginosa*  
444 Infections. *J Infect Dis* 2017; **215**: S44–S51.
- 445 6. Boucher HW, Talbot GH, Bradley JS, Edwards JE, Gilbert D, Rice LB, et al. Bad Bugs, No Drugs: No  
446 ESKAPE! An Update from the Infectious Diseases Society of America. *Clin Infect Dis* 2009; **48**: 1–12.
- 447 7. Breidenstein EBM, de la Fuente-Núñez C, Hancock REW. *Pseudomonas aeruginosa*: all roads lead to  
448 resistance. *Trends Microbiol* 2011; **19**: 419–26.
- 449 8. Cornaglia G, Giamarellou H, Rossolini GM. Metallo- $\beta$ -lactamases: a last frontier for  $\beta$ -lactams? *Lancet*

- 450           *Infect Dis* 2011; **11**: 381–93.
- 451    9.     Kidd TJ, Ritchie SR, Ramsay KA, Grimwood K, Bell SC, Rainey PB. *Pseudomonas aeruginosa* Exhibits  
452           Frequent Recombination, but Only a Limited Association between Genotype and Ecological Setting.  
453           *PLoS One* 2012; **7**: e44199.
- 454    10.    Scientific Opinion on Carbapenem resistance in food animal ecosystems. *EFSA J* 2013; **11**.
- 455    11.    World Health Organization. GLOBAL PRIORITY LIST OF ANTIBIOTIC-RESISTANT BACTERIA TO GUIDE  
456           RESEARCH, DISCOVERY, AND DEVELOPMENT OF NEW ANTIBIOTICS. [http://www.who.int/news-](http://www.who.int/news-room/detail/27-02-2017-who-publishes-list-of-bacteria-for-which-new-antibiotics-are-urgently-needed)  
457           room/detail/27-02-2017-who-publishes-list-of-bacteria-for-which-new-antibiotics-are-urgently-  
458           needed. Accessed 11 Aug 2018.
- 459    12.    Scotta C, Juan C, Cabot G, Oliver A, Lalucat J, Bennisar A, et al. Environmental microbiota represents a  
460           natural reservoir for dissemination of clinically relevant metallo-beta-lactamases. *Antimicrob Agents*  
461           *Chemother* 2011; **55**: 5376–9.
- 462    13.    Poirel L, Rodríguez-Martínez J-M, Al Naiemi N, Debets-Ossenkopp YJ, Nordmann P. Characterization of  
463           DIM-1, an integron-encoded metallo-beta-lactamase from a *Pseudomonas stutzeri* clinical isolate in  
464           the Netherlands. *Antimicrob Agents Chemother* 2010; **54**: 2420–4.
- 465    14.    Juan C, Zamorano L, Mena A, Alberti S, Perez JL, Oliver A. Metallo-β-lactamase-producing *Pseudomonas*  
466           putida as a reservoir of multidrug resistance elements that can be transferred to successful  
467           *Pseudomonas aeruginosa* clones. *J Antimicrob Chemother* 2010; **65**: 474–478.
- 468    15.    Queenan AM, Bush K. Carbapenemases: the versatile beta-lactamases. *Clin Microbiol Rev* 2007; **20**:  
469           440–58, table of contents.
- 470    16.    Amos GCA, Ploumaki S, Zhang L, Hawkey PM, Gaze WH, Wellington EMH. The widespread  
471           dissemination of integrons throughout bacterial communities in a riverine system. *ISME J* 2018; **12**:  
472           681–691.
- 473    17.    Mazel D. Integrons: agents of bacterial evolution. *Nat Rev Microbiol* 2006; **4**: 608–620.
- 474    18.    Gaze WH, Zhang L, Abdousslam NA, Hawkey PM, Calvo-Bado L, Royle J, et al. Impacts of anthropogenic

- 475 activity on the ecology of class 1 integrons and integron-associated genes in the environment. *ISME J*  
476 2011; **5**: 1253–1261.
- 477 19. Kung VL, Ozer EA, Hauser AR. The accessory genome of *Pseudomonas aeruginosa*. *Microbiol Mol Biol*  
478 *Rev* 2010; **74**: 621–41.
- 479 20. Partridge SR, Kwong SM, Firth N, Jensen SO. Mobile Genetic Elements Associated with Antimicrobial  
480 Resistance. *Clin Microbiol Rev* 2018; **31**: e00088-17.
- 481 21. Toleman MA, Walsh TR. Combinatorial events of insertion sequences and ICE in Gram-negative  
482 bacteria. *FEMS Microbiol Rev* 2011; **35**: 912–935.
- 483 22. Enault F, Briet A, Bouteille L, Roux S, Sullivan MB, Petit M-A. Phages rarely encode antibiotic resistance  
484 genes: a cautionary tale for virome analyses. *ISME J* 2017; **11**: 237–247.
- 485 23. San Millan A. Evolution of Plasmid-Mediated Antibiotic Resistance in the Clinical Context. *Trends*  
486 *Microbiol* 2018; **0**.
- 487 24. Fillol-Salom A, Martínez-Rubio R, Abdulrahman RF, Chen J, Davies R, Penadés JR. Phage-inducible  
488 chromosomal islands are ubiquitous within the bacterial universe. *ISME J* 2018; **1**.
- 489 25. Bellanger X, Payot S, Leblond-Bourget N, Guédon G. Conjugative and mobilizable genomic islands in  
490 bacteria: evolution and diversity. *FEMS Microbiol Rev* 2014; **38**: 720–760.
- 491 26. Langille MGI, Hsiao WWL, Brinkman FSL. Detecting genomic islands using bioinformatics approaches.  
492 *Nat Rev Microbiol* 2010; **8**: 373–382.
- 493 27. Chen J, Novick RP. Phage-mediated intergeneric transfer of toxin genes. *Science* 2009; **323**: 139–41.
- 494 28. Tazzyman SJ, Hall AR. Lytic phages obscure the cost of antibiotic resistance in *Escherichia coli*. *ISME J*  
495 2015; **9**: 809–820.
- 496 29. Wozniak RAF, Waldor MK. Integrative and conjugative elements: mosaic mobile genetic elements  
497 enabling dynamic lateral gene flow. *Nat Rev Microbiol* 2010; **8**: 552–563.
- 498 30. Johnson CM, Grossman AD. Integrative and Conjugative Elements (ICEs): What They Do and How They  
499 Study. *Annu Rev Genet* 2015; **49**: 577–601.

- 500 31. Delavat F, Miyazaki R, Carraro N, Pradervand N, van der Meer JR. The hidden life of integrative and  
501 conjugative elements. *FEMS Microbiol Rev* 2017; **41**: 512–537.
- 502 32. Guédon G, Libante V, Coluzzi C, Payot S, Leblond-Bourget N. The Obscure World of Integrative and  
503 Mobilizable Elements, Highly Widespread Elements that Pirate Bacterial Conjugative Systems. *Genes*  
504 (*Basel*) 2017; **8**: 337.
- 505 33. Delavat F, Mitri S, Pelet S, van der Meer JR. Highly variable individual donor cell fates characterize  
506 robust horizontal gene transfer of an integrative and conjugative element. *Proc Natl Acad Sci U S A*  
507 2016; **113**: E3375–83.
- 508 34. Burrus V. Mechanisms of stabilization of integrative and conjugative elements. *Curr Opin Microbiol*  
509 2017; **38**: 44–50.
- 510 35. Smillie C, Garcillán-Barcia MP, Francia MV, Rocha EPC, de la Cruz F. Mobility of plasmids. *Microbiol Mol*  
511 *Biol Rev* 2010; **74**: 434–52.
- 512 36. Garcillán-Barcia MP, Alvarado A, de la Cruz F. Identification of bacterial plasmids based on mobility and  
513 plasmid population biology. *FEMS Microbiol Rev* 2011; **35**: 936–956.
- 514 37. Guglielmini J, Néron B, Abby SS, Garcillán-Barcia MP, de la Cruz F, Rocha EPC. Key components of the  
515 eight classes of type IV secretion systems involved in bacterial conjugation or protein secretion. *Nucleic*  
516 *Acids Res* 2014; **42**: 5715–27.
- 517 38. Guglielmini J, Quintais L, Garcillán-Barcia MP, de la Cruz F, Rocha EPC. The Repertoire of ICE in  
518 Prokaryotes Underscores the Unity, Diversity, and Ubiquity of Conjugation. *PLoS Genet* 2011; **7**:  
519 e1002222.
- 520 39. Carraro N, Poulin D, Burrus V. Replication and Active Partition of Integrative and Conjugative Elements  
521 (ICEs) of the SXT/R391 Family: The Line between ICEs and Conjugative Plasmids Is Getting Thinner.  
522 *PLOS Genet* 2015; **11**: e1005298.
- 523 40. Cury J, Touchon M, Rocha EPC. Integrative and conjugative elements and their hosts: composition,  
524 distribution and organization. *Nucleic Acids Res* 2017; **45**: 8943–8956.

- 525 41. Baltrus DA. Exploring the costs of horizontal gene transfer. *Trends Ecol Evol* 2013; **28**: 489–495.
- 526 42. Harrison EM, Carter MEK, Luck S, Ou H-Y, He X, Deng Z, et al. Pathogenicity islands PAPI-1 and PAPI-2  
527 contribute individually and synergistically to the virulence of *Pseudomonas aeruginosa* strain PA14.  
528 *Infect Immun* 2010; **78**: 1437–46.
- 529 43. He J, Baldini RL, Déziel E, Saucier M, Zhang Q, Liberati NT, et al. The broad host range pathogen  
530 *Pseudomonas aeruginosa* strain PA14 carries two pathogenicity islands harboring plant and animal  
531 virulence genes. *Proc Natl Acad Sci U S A* 2004; **101**: 2530–5.
- 532 44. Botelho J, Grosso F, Peixe L. Characterization of the pJB12 Plasmid from *Pseudomonas aeruginosa*  
533 Reveals Tn6352, a Novel Putative Transposon Associated with Mobilization of the blaVIM-2-Harboring  
534 In58 Integron. *Antimicrob Agents Chemother* 2017; **61**: e02532-16.
- 535 45. Botelho J, Grosso F, Quinteira S, Mabrouk A, Peixe L. The complete nucleotide sequence of an IncP-2  
536 megaplasmid unveils a mosaic architecture comprising a putative novel blaVIM-2-harboring  
537 transposon in *Pseudomonas aeruginosa*. *J Antimicrob Chemother* 2017; **72**: 2225–2229.
- 538 46. San Millan A, Toll-Riera M, Escudero JA, Cantón R, Coque TM, MacLean RC. Sequencing of plasmids  
539 pAMBL1 and pAMBL2 from *Pseudomonas aeruginosa* reveals a bla<sub>VIM-1</sub> amplification causing high-level  
540 carbapenem resistance. *J Antimicrob Chemother* 2015; **70**: 3000–3003.
- 541 47. Sun F, Zhou D, Wang Q, Feng J, Feng W, Luo W, et al. Genetic characterization of a novel bla<sub>DIM-2</sub> -  
542 carrying megaplasmid p12969-DIM from clinical *Pseudomonas putida*. *J Antimicrob Chemother* 2016;  
543 **71**: 909–912.
- 544 48. Roy Chowdhury P, Scott M, Worden P, Huntington P, Hudson B, Karagiannis T, et al. Genomic islands 1  
545 and 2 play key roles in the evolution of extensively drug-resistant ST235 isolates of *Pseudomonas*  
546 *aeruginosa*. *Open Biol* 2016; **6**.
- 547 49. Botelho J, Grosso F, Peixe L. Unravelling the genome of a *Pseudomonas aeruginosa* isolate belonging to  
548 the high-risk clone ST235 reveals an integrative conjugative element housing a blaGES-6  
549 carbapenemase. *J Antimicrob Chemother* 2018; **73**: 77–83.
- 550 50. Botelho J, Grosso F, Quinteira S, Brilhante M, Ramos H, Peixe L. Two decades of blaVIM-2-producing

- 551 Pseudomonas aeruginosa dissemination: an interplay between mobile genetic elements and successful  
552 clones. *J Antimicrob Chemother* 2018; **73**: 873–882.
- 553 51. Buchfink B, Xie C, Huson DH. Fast and sensitive protein alignment using DIAMOND. *Nat Methods* 2015;  
554 **12**: 59–60.
- 555 52. Seemann T. Prokka: rapid prokaryotic genome annotation. *Bioinformatics* 2014; **30**: 2068–2069.
- 556 53. Kearse M, Moir R, Wilson A, Stones-Havas S, Cheung M, Sturrock S, et al. Geneious Basic: an integrated  
557 and extendable desktop software platform for the organization and analysis of sequence data.  
558 *Bioinformatics* 2012; **28**: 1647–9.
- 559 54. Sullivan MJ, Petty NK, Beatson SA. Easyfig: a genome comparison visualizer. *Bioinformatics* 2011; **27**:  
560 1009–10.
- 561 55. Arndt D, Grant JR, Marcu A, Sajed T, Pon A, Liang Y, et al. PHASTER: a better, faster version of the  
562 PHAST phage search tool. *Nucleic Acids Res* 2016; **44**: W16–W21.
- 563 56. Siguiet P, Perochon J, Lestrade L, Mahillon J, Chandler M. ISfinder: the reference centre for bacterial  
564 insertion sequences. *Nucleic Acids Res* 2006; **34**: D32–D36.
- 565 57. Partridge SR, Tsafnat G. Automated annotation of mobile antibiotic resistance in Gram-negative  
566 bacteria: the Multiple Antibiotic Resistance Annotator (MARA) and database. *J Antimicrob Chemother*  
567 2018; **73**: 883–890.
- 568 58. Huerta-Cepas J, Forslund K, Coelho LP, Szklarczyk D, Jensen LJ, von Mering C, et al. Fast Genome-Wide  
569 Functional Annotation through Orthology Assignment by eggNOG-Mapper. *Mol Biol Evol* 2017; **34**:  
570 2115–2122.
- 571 59. Jones P, Binns D, Chang H-Y, Fraser M, Li W, McAnulla C, et al. InterProScan 5: genome-scale protein  
572 function classification. *Bioinformatics* 2014; **30**: 1236–40.
- 573 60. Kaas RS, Leekitcharoenphon P, Aarestrup FM, Lund O. Solving the Problem of Comparing Whole  
574 Bacterial Genomes across Different Sequencing Platforms. *PLoS One* 2014; **9**: e104984.
- 575 61. Jolley KA, Maiden MCJ. BIGSdb: Scalable analysis of bacterial genome variation at the population level.

- 576 *BMC Bioinformatics* 2010; **11**: 595.
- 577 62. Richter M, Rosselló-Móra R, Oliver Glöckner F, Peplies J. JSpeciesWS: a web server for prokaryotic  
578 species circumscription based on pairwise genome comparison. *Bioinformatics* 2016; **32**: 929–931.
- 579 63. Ding Y, Teo JWP, Drautz-Moses DI, Schuster SC, Givskov M, Yang L. Acquisition of resistance to  
580 carbapenem and macrolide-mediated quorum sensing inhibition by *Pseudomonas aeruginosa* via  
581 ICETn43716385. *Commun Biol* 2018; **1**: 57.
- 582 64. Fonseca EL, Marin MA, Encinas F, Vicente ACP. Full characterization of the integrative and conjugative  
583 element carrying the metallo- $\beta$ -lactamase *bla*<sub>SPM-1</sub> and bicyclomycin *bcr1* resistance genes found in the  
584 pandemic *Pseudomonas aeruginosa* clone SP/ST277 : Figure 1. *J Antimicrob Chemother* 2015; **70**:  
585 2547–2550.
- 586 65. Nascimento APB, Ortiz MF, Martins WMBS, Morais GL, Fehlberg LCC, Almeida LGP, et al. Intracolonial  
587 Genome Stability of the Metallo- $\beta$ -lactamase SPM-1-producing *Pseudomonas aeruginosa* ST277, an  
588 Endemic Clone Disseminated in Brazilian Hospitals. *Front Microbiol* 2016; **7**: 1946.
- 589 66. Weingarten RA, Johnson RC, Conlan S, Ramsburg AM, Dekker JP, Lau AF, et al. Genomic Analysis of  
590 Hospital Plumbing Reveals Diverse Reservoir of Bacterial Plasmids Conferring Carbapenem Resistance.  
591 *MBio* 2018; **9**: e02011-17.
- 592 67. Giani T, Arena F, Pollini S, Di Pilato V, D'Andrea MM, Henrici De Angelis L, et al. Italian nationwide  
593 survey on *Pseudomonas aeruginosa* from invasive infections: activity of ceftolozane/tazobactam and  
594 comparators, and molecular epidemiology of carbapenemase producers. *J Antimicrob Chemother*  
595 2018; **73**: 664–671.
- 596 68. Turton JF, Wright L, Underwood A, Witney AA, Chan Y-T, Al-Shahib A, et al. High-Resolution Analysis by  
597 Whole-Genome Sequencing of an International Lineage (Sequence Type 111) of *Pseudomonas*  
598 *aeruginosa* Associated with Metallo-Carbapenemases in the United Kingdom. *J Clin Microbiol* 2015; **53**:  
599 2622–31.
- 600 69. Tada T, Kitao T, Miyoshi-Akiyama T, Kirikae T. Genome sequence of multidrug-resistant *Pseudomonas*  
601 *aeruginosa* NCGM1179. *J Bacteriol* 2011; **193**: 6397.



- 602 70. Toleman MA, Bennett PM, Walsh TR. ISCR elements: novel gene-capturing systems of the 21st  
603 century? *Microbiol Mol Biol Rev* 2006; **70**: 296–316.
- 604 71. Partridge SR. Analysis of antibiotic resistance regions in Gram-negative bacteria. *FEMS Microbiol Rev*  
605 2011; **35**: 820–855.
- 606 72. Shimizu W, Kayama S, Kouda S, Ogura Y, Kobayashi K, Shigemoto N, et al. Persistence and epidemic  
607 propagation of a *Pseudomonas aeruginosa* sequence type 235 clone harboring an IS26 composite  
608 transposon carrying the bla<sub>IMP-1</sub> integron in Hiroshima, Japan, 2005 to 2012. *Antimicrob Agents*  
609 *Chemother* 2015; **59**: 2678–87.
- 610 73. Varghese NJ, Mukherjee S, Ivanova N, Konstantinidis KT, Mavrommatis K, Kyrpides NC, et al. Microbial  
611 species delineation using whole genome sequences. *Nucleic Acids Res* 2015; **43**: 6761–71.
- 612 74. Baquero F. From pieces to patterns: evolutionary engineering in bacterial pathogens. *Nat Rev*  
613 *Microbiol* 2004; **2**: 510–518.
- 614 75. Miyoshi-Akiyama T, Tada T, Ohmagari N, Viet Hung N, Tharavichitkul P, Pokhrel BM, et al. Emergence  
615 and Spread of Epidemic Multidrug-Resistant *Pseudomonas aeruginosa*. *Genome Biol Evol* 2017; **9**:  
616 3238–3245.
- 617 76. Bondy-Denomy J, Davidson AR. To acquire or resist: the complex biological effects of CRISPR-Cas  
618 systems. *Trends Microbiol* 2014; **22**: 218–25.
- 619 77. van Belkum A, Soriaga LB, LaFave MC, Akella S, Veyrieras J-B, Barbu EM, et al. Phylogenetic Distribution  
620 of CRISPR-Cas Systems in Antibiotic-Resistant *Pseudomonas aeruginosa*. *MBio* 2015; **6**: e01796-15.
- 621 78. Touchon M, Hoede C, Tenaillon O, Barbe V, Baeriswyl S, Bidet P, et al. Organised Genome Dynamics in  
622 the *Escherichia coli* Species Results in Highly Diverse Adaptive Paths. *PLoS Genet* 2009; **5**: e1000344.
- 623 79. Rocha EPC. The replication-related organization of bacterial genomes. *Microbiology* 2004; **150**: 1609–  
624 1627.
- 625 80. Knezevic P, Voet M, Lavigne R. Prevalence of Pf1-like (pro)phage genetic elements among  
626 *Pseudomonas aeruginosa* isolates. *Virology* 2015; **483**: 64–71.

- 627 81. Whiteley M, Bangera MG, Bumgarner RE, Parsek MR, Teitzel GM, Lory S, et al. Gene expression in  
628 *Pseudomonas aeruginosa* biofilms. *Nature* 2001; **413**: 860–864.
- 629 82. Secor PR, Michaels LA, Smigiel KS, Rohani MG, Jennings LK, Hisert KB, et al. Filamentous Bacteriophage  
630 Produced by *Pseudomonas aeruginosa* Alters the Inflammatory Response and Promotes Noninvasive  
631 Infection In Vivo. *Infect Immun* 2017; **85**: e00648-16.
- 632 83. Roberts AP, Mullany P. Tn 916 -like genetic elements: a diverse group of modular mobile elements  
633 conferring antibiotic resistance. *FEMS Microbiol Rev* 2011; **35**: 856–871.
- 634 84. Rubio-Cosials A, Schulz EC, Lambertsen L, Smyshlyayev G, Rojas-Cordova C, Forslund K, et al.  
635 Transposase-DNA Complex Structures Reveal Mechanisms for Conjugative Transposition of Antibiotic  
636 Resistance. *Cell* 2018; **173**: 208–220.e20.
- 637
- 638
